# Supplementary material for: MTH1 protects platelet mitochondria from oxidative damage and regulates platelet function and thrombosis
Source: PubMed Central journal article supplement (PMC10415391; doi:10.1038/s41467-023-40600-7), 2023-08-10
Supplement: 41467_2023_40600_MOESM3_ESM.pdf [file 41467_2023_40600_MOESM3_ESM.pdf]

## **Description of Additional Supplementary Files**

**Supplementary Data 1:** Number of phosphopeptides and phosphoproteins with phosphosites identified by the quantitative phosphoproteomics assay.

**Supplementary Data 2:** Number of dysregulated phosphopeptides between two groups.
